## Postoperative analgesia in infants and children

P.-A. Lönnqvist<sup>1†</sup> and N. S. Morton<sup>2\*†</sup>

<sup>1</sup>Astrid Lindgrens Children's Hospital, Karolinska University Hospital, Stockholm, Sweden. <sup>2</sup>University of Glasgow, Royal Hospital for Sick Children, Glasgow, Scotland, UK

\*Corresponding author. E-mail: nsmorton@tiscali.co.uk

Br J Anaesth 2005; 95: 59–68

**Keywords:** analgesia, paediatric; analgesics; pain, acute; pain, postoperative

Over 20 yr ago, a survey reported that 40% of paediatric surgical patients experienced moderate or severe postoperative pain and that 75% had insufficient analgesia.<sup>106</sup> Since then, a range of safe and effective techniques have been developed.

### Neonatal pain perception

The structural components necessary to perceive pain are already present at about 25 weeks gestation whereas the endogenous descending inhibitory pathways are not fully developed until mid-infancy.<sup>2,4,164</sup> Opioid and other receptors are much more widely distributed in fetuses and neonates.<sup>52,53,62,66,127</sup> Fetuses subjected to intrauterine exchange transfusion with needle transhepatic access will show both behavioural signs of pain as well as a hormonal stress response.<sup>64</sup> Significant pain stimulation without proper analgesia, for example circumcision, will not only cause unacceptable pain at the time of the intervention but will produce a 'pain memory' as illustrated by an exaggerated pain response to vaccination as long as 6 months following the circumcision.<sup>148–150</sup> Both neonates and infants are able to mount a graded hormonal stress response to surgical interventions and adequate intra- and postoperative analgesia will not only modify the stress response but has also been shown to reduce morbidity and mortality.<sup>1,3,5,6,16,17,163,167</sup>

### Successful postoperative pain management in infants and children

A pragmatic, practical approach to paediatric postoperative pain management has been developed and used in recent years in most paediatric centres. Realistic aims are to recognize pain in children, to minimize moderate and severe pain safely in all children, to prevent pain where it is predictable, to bring pain rapidly under control and to continue pain control after discharge from hospital.<sup>108,109,117,119,125</sup>

Prevention of pain whenever possible, using multi-modal analgesia, has been shown to work well for nearly all cases and can be adapted for day cases, major cases, the critically ill child, or the very young. Many acute pain services use

techniques of concurrent or co-analgesia based on four classes of analgesics, namely local anaesthetics, opioids, non-steroidal anti-inflammatory drugs (NSAIDs), and acetaminophen (paracetamol).<sup>61,72,74,97,98,117,119,135</sup> In particular, a local/regional analgesic technique should be used in *all* cases unless there is a specific reason not to and the opioid-sparing effects of local anaesthetics, NSAIDs, and acetaminophen (paracetamol) are useful. Indeed, for many day-case procedures, opioids may be omitted because combinations of the other three classes provide good pain control in most cases.<sup>88,125</sup> Regional anaesthesia is nearly always conducted in *anaesthetized* children, but some high risk neonates have lower perioperative morbidity after inguinal surgery when *awake* spinal anaesthesia is used.<sup>91,161</sup>

An individualized pain management plan<sup>72</sup> can be made for each child based on a cycle of assessment and documentation of the child's pain using appropriate tools and self-reporting, with interventions linked to the assessments.<sup>30,60,63</sup> A safety net is needed for rapid control of breakthrough pain, to monitor the efficacy of analgesia, to identify and treat adverse effects, and to ensure equipment is functioning correctly.<sup>116</sup>

In paediatric hospitals or other centres with significant numbers of paediatric surgical interventions, the establishment of a dedicated paediatric pain service is the standard of care. Where this is not possible, adult pain services often manage children with specific paediatric medical and nursing advice and expertise. In other settings substantial improvement is possible by the establishment of clinical routines and protocols for the assessment and treatment of paediatric postoperative pain. A network of nurses with a special interest in paediatric pain management can form the basis for continuous education. A well-structured protocol for postoperative analgesia with clear instructions for parents is essential following paediatric day-case surgery.<sup>118,124,125,165</sup>

<sup>†</sup>*Declaration of interest.* Drs Lönnqvist and Morton's departments have received financial support from AstraZeneca and Abbott. Dr Morton has acted as a Consultant for AstraZeneca and Smith and Nephew Pharmaceuticals.

## Local and regional anaesthesia

### *Benefits associated with the use of paediatric regional anaesthesia*

Regional anaesthesia produces excellent postoperative analgesia and attenuation of the stress response in infants and children.<sup>22 43 48 139 166 167</sup> Epidural anaesthesia can decrease the need for postoperative ventilation after tracheo-oesophageal fistula repair,<sup>26</sup> and reduce the complications and costs following open fundoplication.<sup>110 162</sup>

### *Safety aspects of paediatric regional anaesthesia*

A large prospective 1-yr survey of more than 24 000 paediatric regional anaesthetic blocks found an overall incidence of complications of 0.9 in 1000 blocks, with no complications of peripheral techniques.<sup>65</sup> Complications were transient and half were judged to have been caused by the use of inappropriate equipment. The commonest problems with paediatric regional anaesthesia are technical: either failure to establish a block or failure of maintenance of the block. Infection, pressure area problems, peripheral nerve injury, local anaesthetic toxicity, and serious adverse effects of opioids are much rarer.<sup>42</sup> A large 5-yr prospective audit of 10 000 paediatric epidural catheter techniques is currently taking place in the UK to try to establish the relative risk of these problems in modern practice.

### *Some simple local anaesthetic techniques for postoperative analgesia*

Local anaesthetic gel topically applied to the site of circumcision, and instilled onto or infiltrated into small open wounds are simple, safe, and effective techniques.<sup>7 56 135</sup> Wound perfusion can also be particularly useful for iliac crest bone graft donor sites (used for alveolar bone grafting in some techniques of cleft palate repair).<sup>119</sup> Dressing perfusion by applying dilute local anaesthetic onto a foam layer applied to skin graft donor sites is also simple, very effective and safe provided the maximum dosage limits are strictly adhered to. These sites can otherwise be extremely distressing to the child for a period up to 48 h.<sup>119</sup>

### *Recent developments in regional analgesia*

Descriptions of the technical aspects of regional anaesthesia and management of the child with regional block are readily available.<sup>35 41 119 121 124 130</sup> Pharmacokinetics of local anaesthetics in infants and children have been comprehensively reviewed recently.<sup>107</sup>

### *Spread of epidural dye*

Radiological assessment of contrast injected through epidural catheters in babies (1.8–4.5 kg) after major surgery found that both the quality and extent of spread were different for every baby. Filling defects and ‘skipped’ segments were common. Spread was more extensive after 1 ml kg<sup>-1</sup> compared with 0.5 ml kg<sup>-1</sup> (mean 11.5 [3.03] vs 9.3 [3.68]

segments,  $P=0.014$ ) (but not twice as great) with fewer ‘skipped’ segments and greater density of dye.<sup>158</sup>

### *Confirming the tip position of catheters threaded from the sacral hiatus*

The technique of threading catheters from the sacral hiatus to position the tip at thoracic or lumbar level<sup>24</sup> reported success rates of 85–96%, particularly in small children. A retrospective review of radiographs in babies younger than 6 months of age<sup>156</sup> found that only 58 catheter tips were considered optimal (67%); 10 were too high (12%); and 17 were coiled at the lumbosacral level (20%). Some units use radiological screening routinely but for many others this is not feasible. An alternative approach using electrocardiography has been described.<sup>153</sup> A specially devised catheter enables display of the electrocardiograph (ECG) signal from the tip and this is compared with the ECG from a surface electrode positioned at the ‘target’ segmental level. When the ECG traces are identical, the tip of the catheter is at the target level. In a descriptive study of 20 children aged 0–36 months, the authors were able to position all the tips to within two vertebral spaces of the target levels (either T4, T7, or T10). In contrast to their previous method of using stimulating epidural catheters and evaluating muscle contractions,<sup>154</sup> the technique can be used after administration of neuromuscular blocking agents or epidural local anaesthetics. However, neither of the two techniques described by Tsui<sup>153 154</sup> will exclude a catheter lying at the appropriate segmental level but in the subarachnoid space or intravascularly.

### *Ultrasonography-guided regional anaesthetic techniques*

Ultrasonography allows real-time visualization of anatomical structures, guides the blocking procedure itself, and shows the spread of the local anaesthetic solution injected. A more rapid onset of block using less local anaesthetic solution is particularly attractive for paediatrics where most blocks are sited in anaesthetized patients. Ultrasound guidance can also be helpful for caudal and epidural blocks in infants and children as the sacrum and vertebrae are not fully ossified.<sup>33 103</sup> Ultrasound-guided techniques have been described for infraclavicular brachial plexus blockade,<sup>86</sup> and lumbar plexus block in children.<sup>103</sup>

### *Surface mapping of peripheral nerves with a nerve stimulator*

Nerve mapping using a nerve stimulator is helpful for teaching peripheral nerve and plexus blocks in the upper and lower limbs, and in patients where the surface landmarks are obscure or distorted.<sup>27</sup>

### *Use of continuous peripheral nerve blocks*

Continuous catheter techniques are becoming popular in children for femoral, brachial plexus, fascia iliaca, lumbar plexus, and sciatic blockade.<sup>37 39 40 82</sup> Disposable infusion devices can be used as an alternative to standard infusion equipment.<sup>38</sup>

**Table 1** Suggested maximum dosages of bupivacaine, levobupivacaine, and ropivacaine in neonates and children. The same dose is recommended for each drug

| Single bolus injection            | Maximum dosage                          |
|-----------------------------------|-----------------------------------------|
| Neonates                          | 2 mg kg <sup>-1</sup>                   |
| Children                          | 2.5 mg kg <sup>-1</sup>                 |
| Continuous postoperative infusion | Maximum infusion rate                   |
| Neonates                          | 0.2 mg kg <sup>-1</sup> h <sup>-1</sup> |
| Children                          | 0.4 mg kg <sup>-1</sup> h <sup>-1</sup> |

### Choice of local anaesthetic solution

A large safety study has established safe-dosing guidelines for racemic bupivacaine in children (Table 1) and this has greatly reduced the incidence of systemic toxicity.<sup>19,169</sup> Racemic bupivacaine is gradually being replaced by ropivacaine or levobupivacaine. This change is driven by the reduced potential for systemic toxicity and the lower risk of unwanted motor blockade. There are now sufficient paediatric data to recommend either of the new agents.<sup>25,31,44,78,79,80,81,82,95,120,133,151,170</sup> Bosenberg has reported non-toxic plasma concentrations of ropivacaine following a dose of up to 3 mg kg<sup>-1</sup> for ilioinguinal blockade,<sup>23,28</sup> but 3.5 mg kg<sup>-1</sup> for fascia iliaca compartment blockade has been reported to cause potentially toxic plasma concentrations, namely 4–5 µg ml<sup>-1</sup>.<sup>129</sup> Thus, the reduced risk of systemic toxicity should not persuade anaesthetists to exceed the previous dosing guidelines for racemic bupivacaine. For continuous epidural levobupivacaine, the use of a 0.0625% solution appears optimal for lower abdominal or urological surgery.<sup>95</sup> For single injection caudal blockade, ropivacaine and levobupivacaine provide similar postoperative analgesia compared to racemic bupivacaine with slightly less early postoperative motor blockade,<sup>36,49,80</sup> and with no discernible differences between ropivacaine and levobupivacaine.<sup>49,79,80</sup> The esterase systems in tissues, plasma, and red blood cells are mature in early life, and ester local anaesthetics such as amethocaine (tetracaine) and 2-chloroprocaine are particularly applicable in neonates.<sup>18,93,99,160</sup>

### Adjuncts to local anaesthetics

A recent systematic review of paediatric caudal adjuncts has been published.<sup>13</sup> Caution is required in neonates as sedation and apnoea have been noted. In a survey of the UK members of the Association of Paediatric Anaesthesia, 58% of respondents stated that they used adjuvants with local anaesthetics for caudal epidural blockade in children to prolong the duration of analgesia without increasing side-effects such as motor blockade. The commonest were ketamine 32%, clonidine 26%, fentanyl 21%, and diamorphine 13%.<sup>140</sup> Although preservative-free racemic ketamine is a very effective agent,<sup>34,126</sup> preservative-free S(+)-ketamine is more potent and may reduce neuro-psychiatric effects.<sup>87</sup> Caudally administered S(+)-ketamine (1 mg kg<sup>-1</sup>) as the sole agent has even been reported to produce similar postoperative analgesia to bupivacaine 0.25% with

epinephrine.<sup>104</sup> The main action of adjunct ketamine is most likely mediated by actions on spinal *N*-methyl D-aspartate (NMDA)-receptors, as the same dose given systemically produces a much shorter duration of analgesia.<sup>105</sup> When used for single injection, S(+)-ketamine has been found to be more effective in prolonging postoperative pain relief than clonidine.<sup>50</sup> The combination of S(+)-ketamine 1 mg kg<sup>-1</sup> and clonidine 1 µg kg<sup>-1</sup> without the concomitant use of local anaesthetics for caudal blockade produced approximately 24 h of adequate postoperative analgesia compared with only 12 h for plain S(+)-ketamine.<sup>68</sup> Adjunct clonidine in the dose range of 1–2 µg kg<sup>-1</sup> for single injection caudal blockade will typically double the duration of analgesia compared with plain local anaesthetics,<sup>83,94</sup> and addition of approximately 0.1 µg kg<sup>-1</sup> h<sup>-1</sup> will enhance the effect of continuous epidural blockade.<sup>51</sup> Recent data suggest that the systemic effect of clonidine might be more important than the local action.<sup>69</sup> The routine use of opioids as additives for postoperative analgesia has recently been critically challenged.<sup>100</sup> Although there is a risk of respiratory depression, less dramatic side-effects such as itching, nausea and vomiting, urinary retention, and decrease gastrointestinal motility are more troublesome.<sup>47,98</sup> A recent comparison of plain levobupivacaine with levobupivacaine combined with fentanyl for postoperative epidural analgesia in children, failed to show any major benefit of adjunct fentanyl.<sup>95</sup> Neuraxial administration of opioids still has a place where extensive analgesia is needed, for example after spinal surgery or liver transplantation,<sup>85,152</sup> or when adequate spread of local anaesthetic blockade cannot be achieved within dosage limits.<sup>18</sup>

### Neuraxial blockade for paediatric cardiac surgery

The potential benefits and risks of regional anaesthesia for paediatric cardiac surgery have recently been investigated and reviewed.<sup>21,57,75,76</sup> Single doses of intrathecal opioids with or without local anaesthetic, or continuous spinal anaesthesia using a microcatheter technique appear particularly promising for open heart surgery, while epidural or paravertebral techniques seem to offer benefit for closed procedures. The main concern is that of local bleeding at the site of subarachnoid or epidural puncture in a heparinized child.<sup>21</sup>

## Systemic analgesia

The ranking of systemic analgesics in adults by efficacy when administered alone or in combination probably applies also to infants and children.<sup>112</sup> However, the pharmacokinetics and pharmacodynamics of these agents change during early life and recent evidence has produced more logical dosing guidelines for opioids, NSAIDs, and acetaminophen (paracetamol) (Tables 2–6).<sup>8,9,11,15,54,67,70,96,101,114,122,136</sup> Appropriate child-friendly formulations help compliance and are now available as syrups, oral or sublingual wafers, soluble effervescent tablets, and eye drops. Metabolic pathways for many drugs are maturing in early life and indeed

**Table 2** Morphine dosing guidelines (an appropriate monitoring protocol should be used)

|                                                                                   |
|-----------------------------------------------------------------------------------|
| <b>Titrated loading dose of i.v. morphine</b>                                     |
| 50 $\mu\text{g kg}^{-1}$ increments, repeated up to $\times 4$                    |
| <b>I.V. or s.c. morphine infusion</b>                                             |
| 10–40 $\mu\text{g kg}^{-1} \text{h}^{-1}$                                         |
| <b>PCA with morphine</b>                                                          |
| Bolus dose 20 $\mu\text{g kg}^{-1}$                                               |
| Lockout interval 5 min                                                            |
| Background infusion 4 $\mu\text{g kg}^{-1} \text{h}^{-1}$ (especially first 24 h) |
| <b>Nurse controlled analgesia (NCA) with morphine</b>                             |
| Bolus dose 20 $\mu\text{g kg}^{-1}$                                               |
| Lockout interval 30 min                                                           |
| Background infusion 20 $\mu\text{g kg}^{-1} \text{h}^{-1}$                        |

**Table 3** Opioids: relative potency and dosing. Appropriate monitoring and ventilatory support must be used

| Drug          | Potency relative to morphine | Single dose                      | Continuous infusion                                            |
|---------------|------------------------------|----------------------------------|----------------------------------------------------------------|
| Tramadol      | 0.1                          | 1–2 $\text{mg kg}^{-1}$          |                                                                |
| Morphine      | 1                            | 0.05–0.2 $\text{mg kg}^{-1}$     | 10–40 $\mu\text{g kg}^{-1}$                                    |
| Hydromorphone | 5                            | 0.01–0.03 $\text{mg kg}^{-1}$    |                                                                |
| Alfentanil    | 10                           | 5–10 $\mu\text{g kg}^{-1}$       | 1–4 $\mu\text{g kg}^{-1} \text{min}^{-1}$ or use TCI system    |
| Fentanyl      | 50–100                       | 0.5–1 $\mu\text{g kg}^{-1}$      | 0.1–0.2 $\mu\text{g kg}^{-1} \text{min}^{-1}$                  |
| Remifentanil  | 50–100                       | 0.1–1 $\mu\text{g kg}^{-1}$      | 0.05–4 $\mu\text{g kg}^{-1} \text{min}^{-1}$ or use TCI system |
| Sufentanil    | 500–1000                     | 0.025–0.05 $\mu\text{g kg}^{-1}$ | Use TCI system                                                 |

**Table 4** Context sensitive half times of opioids in children

| Infusion duration (min) | 10  | 100 | 200 | 300 | 600 |
|-------------------------|-----|-----|-----|-----|-----|
| Remifentanil            | 3–6 | 3–6 | 3–6 | 3–6 | 3–6 |
| Alfentanil              | 10  | 45  | 55  | 58  | 60  |
| Sufentanil              |     | 20  | 25  | 35  | 60  |
| Fentanyl                | 12  | 30  | 100 | 200 |     |

the proportions of drugs following different routes of metabolism change markedly during this time.<sup>17 141</sup> For example for morphine or acetaminophen (paracetamol), sulphation is efficient and effective in the early neonatal period with glucuronidation maturing some weeks later. Pharmacogenetics is increasingly recognized as important.<sup>77</sup> For example, up to 40% of children do not have the enzyme to metabolize codeine to morphine.<sup>127</sup> Controversy still exists about the safety of NSAIDs for tonsillectomy; whether NSAIDs significantly impede bone healing; and the correct doses of systemic analgesics in less healthy children and in neonates and infants. New agents such as COX-2 inhibitors, new formulations such as i.v. acetaminophen (paracetamol), and properly conducted paediatric pharmacokinetic and pharmacogenetic studies may help solve these problems.

### Opioid techniques in children

Morphine infusions of between 10 and 30  $\mu\text{g kg}^{-1} \text{h}^{-1}$  provide adequate analgesia with an acceptable level of side-effects when administered with the appropriate level of monitoring.<sup>119</sup> Morphine clearance in term infants greater than 1 month old is comparable with children from 1 to 17 yr old. In neonates aged 1–7 days, the clearance of morphine is one-third that of older infants and elimination half-life approximately 1.7 times longer.<sup>12 20</sup> In appropriately selected cases, the s.c. route of administration is a useful alternative to the i.v. route.<sup>111 143</sup> The s.c. route is contraindicated when the child is hypovolaemic or has significant ongoing fluid compartment shifts.<sup>168</sup> Patient-controlled analgesia (PCA) is now widely used in children as young as 5 yr and compares favourably with continuous morphine infusion in the older child.<sup>29</sup> A low dose background infusion is useful in the first 24 h of PCA in children, and has been shown to improve sleep pattern without increasing the adverse effects seen with higher background infusions in children and in adults.<sup>55</sup> Making the hand set part of a squeezable toy is highly popular with younger children. PCA opioid administration is applicable after most major surgical procedures, in sickle cell disease, in management of pain because of mucositis, and in the management of some children with chronic pain. The range of patients receiving opioids in an individually controlled manner can be increased if a nurse or parent is allowed to press the demand button within strictly set guidelines. Monitoring for such patients has to be at least as intensive as that for conventional PCA. Most regimens for nurse or parent controlled analgesia use a higher level of background infusion with a longer lockout time of around 30 min.<sup>72 97 98 109 117 119</sup> This technology can also be used in neonates where a bolus dose without a background infusion allows the nurse to titrate the child to analgesia or to anticipate painful episodes while allowing a prolonged effect from the slower clearance of morphine (Table 2).

### Other methods of opioid delivery

Oral, sublingual, transdermal, intranasal, and rectal routes have been described and have a role in specific cases.<sup>73 101</sup>

### Other opioids

Tramadol, oxycodone, hydromorphone, and buprenorphine may have applicability as alternatives to morphine in the postoperative period.<sup>59 101 171</sup> Pethidine (meperidine) is not recommended in children because of the adverse effects of its main metabolite, norpethidine. Fentanyl, sufentanil, alfentanil, and remifentanil may have a role after major surgery and in intensive care practice. Remifentanil is very titratable and has a context-insensitive half time with extremely rapid recovery because of esterase clearance, but transition to the postoperative phase is difficult to manage and may be complicated by acute tolerance. It may have a particular role in intraoperative stress control and in neonatal anaesthesia.<sup>45 46 102 132 138</sup> Sufentanil and fentanyl have long

**Table 5** Acetaminophen (paracetamol) dosing guide

| Age                  | Oral                   |                                        | Rectal                 |                                        | Maximum daily dose oral or rectal        | Duration at maximum dose |
|----------------------|------------------------|----------------------------------------|------------------------|----------------------------------------|------------------------------------------|--------------------------|
|                      | Loading dose           | Maintenance dose                       | Loading dose           | Maintenance dose                       |                                          |                          |
| Pre-term 28–32 weeks | 20 mg kg <sup>-1</sup> | 15 mg kg <sup>-1</sup> up to 12 hourly | 20 mg kg <sup>-1</sup> | 15 mg kg <sup>-1</sup> up to 12 hourly | 35 mg kg <sup>-1</sup> day <sup>-1</sup> | 48 h                     |
| Pre-term 32–38 weeks | 20 mg kg <sup>-1</sup> | 20 mg kg <sup>-1</sup> up to 8 hourly  | 30 mg kg <sup>-1</sup> | 20 mg kg <sup>-1</sup> up to 12 hourly | 60 mg kg <sup>-1</sup> day <sup>-1</sup> | 48 h                     |
| 0–3 months           | 20 mg kg <sup>-1</sup> | 20 mg kg <sup>-1</sup> up to 8 hourly  | 30 mg kg <sup>-1</sup> | 20 mg kg <sup>-1</sup> up to 12 hourly | 60 mg kg <sup>-1</sup> day               | 48 h                     |
| >3 months            | 20 mg kg <sup>-1</sup> | 15 mg kg <sup>-1</sup> up to 4 hourly  | 40 mg kg <sup>-1</sup> | 20 mg kg <sup>-1</sup> up to 6 hourly  | 90 mg kg <sup>-1</sup> day               | 72 h                     |

**Table 6** I.V. acetaminophen (Perfalgan™) (10 mg ml<sup>-1</sup>) as slow i.v. infusion over 15 min

| Weight (kg) | Dose                   | Maximum daily dose                                     | Dose interval |
|-------------|------------------------|--------------------------------------------------------|---------------|
| 10–32       | 15 mg kg <sup>-1</sup> | 60 mg kg <sup>-1</sup> day <sup>-1</sup> max total 2 g | 4–6 h         |
| 33–50       | 15 mg kg <sup>-1</sup> | 60 mg kg <sup>-1</sup> day <sup>-1</sup> max total 3 g | 4–6 h         |
| >50         | 1 g                    | Max total 4 g                                          | 4–6 h         |

context sensitive half times but give a smoother transition to maintenance analgesia. Alfentanil has a rapid onset, is titratable, and is relatively context insensitive after 90 min, with a relatively smooth transition in the postoperative phase. The potent opioids may be best delivered by target-controlled infusion devices and paediatric pharmacokinetic programmes have now been developed (Tables 3 and 4).

#### Non-steroidal anti-inflammatory drugs (NSAIDs)

NSAIDs are important in the treatment and prevention of mild or moderate pain in children.<sup>89</sup> NSAIDs are highly effective in combination with a local or regional nerve block, particularly in day-case surgery.<sup>89,118</sup> NSAIDs are often used in combination with opioids and the ‘opioid sparing’ effect of NSAIDs is 30–40%, as reported for adults.<sup>10,123</sup> This produces a reduction in opioid-related adverse effects, especially ileus, bladder spasms and skeletal muscle spasms, and facilitates more rapid weaning from opioid infusions or PCA.<sup>72,74,119,128,159</sup> NSAIDs in combination with acetaminophen (paracetamol) produce better analgesia than either alone.<sup>10,71,89</sup> Novel formulations of NSAIDs as eye drops have found application after strabismus correction or laser surgery to the eye.<sup>122</sup> Pharmacokinetic studies of NSAIDs have revealed a higher than expected dose requirement if scaled by body weight from adult doses.<sup>54,137</sup> NSAIDs should be avoided in infants less than 6 months of age,<sup>89,115</sup> children with aspirin or NSAID allergy, those with dehydration or hypovolaemia, children with renal or hepatic failure, or those with coagulation disorders, peptic ulcer disease or where there is a significant risk of haemorrhage. Concurrent administration of NSAIDs with anticoagulants, steroids, and nephrotoxic agents is not recommended. The most commonly reported adverse effects of NSAIDs are bleeding, followed by gastrointestinal, skin, central nervous system, pulmonary, hepatic, and renal toxic effects. Other serious side-effects have been reported,

including oedema, bone marrow suppression, and Stevens–Johnson syndrome.<sup>89,134,136</sup>

#### NSAIDs and tonsillectomy

Two recent meta-analyses have considered the role of NSAIDs in post-tonsillectomy haemorrhage.<sup>92,113</sup> One included studies of aspirin, which is not recommended in children.<sup>92</sup> The other showed a small increased risk of re-operation for bleeding in patients receiving NSAIDs.<sup>113</sup> However, the authors discuss why clear recommendations cannot be drawn from the evidence as the patients receiving NSAIDs benefited from good pain control and reduced PONV.<sup>113</sup> Thus, for every 100 patients, two more will require re-operation if they receive a NSAID than if they do not, but 11 will not have PONV who otherwise would.<sup>113</sup> These meta-analyses did not include studies of COX-2 inhibitors.

#### NSAIDs and asthma

Provocation of bronchospasm by NSAIDs is thought to be a result of a relative excess of leukotriene production. Aspirin sensitivity is present in about 2% of children with asthma and around 5% of these patients are cross-sensitive to other NSAIDs.<sup>89</sup> Caution is required in those with severe eczema or multiple allergies and in those with nasal polyps. It is important to check for past exposure to NSAIDs as many asthmatic children take these agents with no adverse effects.<sup>134</sup> A recent study found no change in lung function in a group of known asthmatic children given a single dose of diclofenac under controlled conditions.<sup>145</sup>

#### NSAIDs and bone healing

Concerns have been raised by animal studies showing impaired bone healing in the presence of NSAIDs.<sup>89</sup> For most orthopaedic surgery in children, the benefits of short-term perioperative use of NSAIDs outweigh the risks but limitation of use is recommended in fusion operations, limb lengthening procedures, and where bone healing has previously been difficult.<sup>89</sup>

#### COX-2 inhibitors in paediatrics

Several COX-2 inhibitors have recently been evaluated in paediatrics, although the situation has been complicated by the withdrawal of rofecoxib from worldwide markets.<sup>155</sup> Some early studies used too low a dose,<sup>131</sup> and pharmacokinetic studies are now informing dosing schedules and intervals in children.<sup>58,146,147</sup> The studies show equal

efficacy to other analgesic interventions with non-selective NSAIDs or acetaminophen (paracetamol) and a morphine-sparing effect, but trials have not been large enough to confirm reduced adverse effects such as bleeding.<sup>84 144 157</sup>

### Acetaminophen (paracetamol)

Acetaminophen inhibits prostaglandin synthesis in the hypothalamus probably via inhibition of cyclooxygenase-3.<sup>32 142</sup> This central action produces both antipyretic and analgesic effects. Acetaminophen also reduces hyperalgesia mediated by substance P, and reduces nitric oxide generation involved in spinal hyperalgesia induced by substance P or NMDA.

The analgesic potency of acetaminophen is relatively low and its actions are dose-related; a ceiling effect is seen with no further analgesia or antipyresis despite an increase in dose. On its own, it can be used to treat or prevent most mild and some moderate pain. In combination with either NSAIDs or weak opioids, such as codeine, it can be used to treat or prevent most moderate pain.<sup>10 112</sup> A morphine-sparing effect has been demonstrated with higher doses in day-cases.<sup>10 90</sup>

Acetaminophen is rapidly absorbed from the small bowel, and oral formulations in syrup, tablet or dispersible forms are widely available and used in paediatric practice. Suppository formulations vary somewhat in their composition and bio-availability, with lipophilic formulations having higher bioavailability. Absorption from the rectum is slow and incomplete, except in neonates.<sup>14</sup> The novel i.v. formulation *pro-paracetamol* is cleaved by plasma esterases to produce half the mass of acetaminophen. Recently, mannitol solubilized paracetamol (Perfalgan<sup>TM</sup>) has become available for i.v. use. Interestingly, the higher effect site concentrations achieved in the brain after i.v. administration may result in higher analgesic potency. Although the site of action of acetaminophen is central, dosing is often based on a putative 'therapeutic plasma concentration' of 10–20 mg ml<sup>-1</sup>. It is important to realize that the time to peak analgesia even after i.v. administration is between 1 and 2 h. The time-concentration profile of acetaminophen in cerebrospinal fluid lags behind that in plasma, with an equilibration half-time of around 45 min. Very few studies have tried to relate the concentration of acetaminophen in CSF or plasma to measurements of analgesia, particularly in children. There is evidence that a plasma concentration of 11 µg ml<sup>-1</sup> or more is associated with lower pain scores. In a computer simulation, a plasma concentration of 25 µg ml<sup>-1</sup> was predicted to result in good pain control in up to 60% of children undergoing tonsillectomy.<sup>8–11 14 15</sup> Dosing regimens for acetaminophen have been revised in the last few years on the basis of age, route of administration, loading dose, maintenance dose, and duration of therapy to ensure a reasonable balance between efficacy and safety. In younger infants, sick children, and the pre-term neonate, considerable downward dose adjustments are needed (Tables 5 and 6).

### Conclusions

Moderate and severe postoperative pain can and should be prevented or controlled safely and effectively in all children whatever their age, severity of illness, or surgical procedure. Continuing pain control at home after day-case surgery is essential. The safety of analgesic therapy has improved with the development of new drugs and fuller understanding of their pharmacokinetics and dynamics in neonates, infants and children, and in disease states. These developments have been aided by technical improvements allowing more accurate delivery of analgesia. Where complex analgesia is needed, management by a multidisciplinary acute pain team with paediatric expertise is the most effective approach.

### References

- 1 Anand KJS, Aynsley-Green A. Measuring the severity of surgical stress in neonates. *J Pediatr Surg* 1988; **23**: 297–305
- 2 Anand KJS, Carr DB. The neuroanatomy, neurophysiology, and neurochemistry of pain, stress, and analgesia in newborns and children. *Pediatr Clin N Am* 1989; **36**: 795–822
- 3 Anand KJS, Phil D, Hansen DD, et al. Hormonal-metabolic stress responses in neonates undergoing cardiac surgery. *Anesthesiology* 1990; **73**: 661–70
- 4 Anand KJS, Phil D, Hickey PR. Pain and its effects in the human neonate and fetus. *N Engl J Med* 1987; **317**: 1321–9
- 5 Anand KJS, Sippel WG, Aynsley-Green A. Randomized trial of fentanyl anesthesia in preterm neonates undergoing surgery: effects on stress response. *Lancet* 1987; **i**: 243–8
- 6 Anand KJS, Sippel WG, Schofield NM, et al. Does halothane anaesthesia decrease the stress response of newborn infants undergoing operation? *Br Med J* 1988; **296**: 668–72
- 7 Andersen KH. A new method of analgesia for relief of circumcision pain. *Anaesthesia* 1989; **44**: 118–20
- 8 Anderson B. What we don't know about paracetamol in children. *Paediatr Anaesth* 1998; **8**: 451–60
- 9 Anderson B, Lin YC, Sussman H, et al. Paracetamol pharmacokinetics in the premature neonate; the problem with limited data. *Paediatr Anaesth* 1998; **8**: 442–3
- 10 Anderson BJ. Comparing the efficacy of NSAIDs and paracetamol in children. *Paediatr Anaesth* 2004; **14**: 201–17
- 11 Anderson BJ, Holford NHG. Rectal paracetamol dosing regimens: determination by computer simulation. *Paediatr Anaesth* 1997; **7**: 451–5
- 12 Anderson BJ, Meakin GH. Scaling for size: some implications for paediatric anaesthesia dosing. *Paediatr Anaesth* 2002; **12**: 205–19
- 13 Ansermino M, Basu R, Vandebek C, et al. Nonopioid additives to local anaesthetics for caudal blockade in children: a systematic review. *Paediatr Anaesth* 2003; **13**: 561–73
- 14 Arana A, Morton NS, Hansen TG. Treatment with paracetamol in infants. *Acta Anaesthesiol Scand* 2001; **45**: 20–9
- 15 Autret EDJ, Jonville AP, Furet Y, et al. Pharmacokinetics of paracetamol in the neonate and infant after administration of propacetamol chlorhydrate. *Dev Pharmacol Therapeut* 1993; **20**: 129–34
- 16 Aynsley-Green A. Pain and stress in infancy and childhood—where to now? *Paediatr Anaesth* 1996; **6**: 167–72
- 17 Aynsley-Green A, Ward-Platt MP, Lloyd-Thomas AR. Stress and pain in infancy and childhood. *Bailliere's Clin Paediatr* 1995; **3**: 449–631

- 18 Berde C. Local anaesthetics in infants and children: an update. *Paediatr Anaesth* 2004; **14**: 387–93
- 19 Berde CB. Toxicity of local anesthetics in infants and children. *J Pediatr* 1993; **122**: S14–20
- 20 Berde CB, Sethna NF. Drug therapy: analgesics for the treatment of pain in children. *N Engl J Med* 2002; **347**: 1094–103
- 21 Bosenberg A. Neuraxial blockade and cardiac surgery in children. *Paediatr Anaesth* 2003; **13**: 559–60
- 22 Bosenberg A. Pediatric regional anesthesia update. *Paediatr Anaesth* 2004; **14**: 398–402
- 23 Bosenberg A, Thomas J, Lopez T, et al. The efficacy of caudal ropivacaine 1, 2 and 3 mg $\times$ l<sup>(-1)</sup> for postoperative analgesia in children. *Paediatr Anaesth* 2002; **12**: 53–8
- 24 Bosenberg AT, Bland BA, Schulte-Steinberg O, et al. Thoracic epidural anesthesia via caudal route in infants. *Anesthesiology* 1988; **69**: 265–9
- 25 Bosenberg AT, Cronje L, Thomas J, et al. Ropivacaine plasma levels and postoperative analgesia in neonates and infants during 48–72 h continuous epidural infusion following major surgery. *Paediatr Anaesth* 2003; **13**: 851–2
- 26 Bosenberg AT, Hadley GP, Wiersma R. Oesophageal atresia: caudo-thoracic epidural anaesthesia reduces the need for post-operative ventilatory support. *Pediatr Surg* 1992; **7**: 289–91
- 27 Bosenberg AT, Raw R, Boezaart AP. Surface mapping of peripheral nerves in children with a nerve stimulator. *Paediatr Anaesth* 2002; **12**: 398–403
- 28 Bosenberg AT, Thomas J, Lopez T, et al. Plasma concentrations of ropivacaine following a single-shot caudal block of 1, 2 or 3 mg/kg in children. *Acta Anaesthesiol Scand* 2001; **45**: 1276–80
- 29 Bray R, Woodhams AM. A double-blind comparison of morphine infusion and patient controlled analgesia in children. *Paediatr Anaesth* 1996; **6**: 121–7
- 30 Buttner W, Finke W. Analysis of behavioural and physiological parameters for the assessment of postoperative analgesic demand in newborns, infants and young children: a comprehensive report on seven consecutive studies. *Paediatr Anaesth* 2000; **10**: 303–18
- 31 Chalkiadis GA, Eyres RL, Cranswick N, et al. Pharmacokinetics of levobupivacaine 0.25% following caudal administration in children under 2 years of age. *Br J Anaesth* 2004; **92**: 218–22
- 32 Chandrasekharan NV, Dai H, Lamar Turepo Roos K, et al. COX-3, a cyclooxygenase-I variant inhibited by acetaminophen and other analgesic/antipyretic drugs: cloning, structure, and expression. *Proc Natl Acad Sci USA* 2002; **99**: 13926–31
- 33 Chawathe MS, Jones RM, Koller J. Detection of epidural catheters with ultrasound in children. *Paediatr Anaesth* 2003; **13**: 681–4
- 34 Cook B, Grubb DJ, Aldridge LA, et al. Comparison of the effects of adrenaline, clonidine and ketamine on the duration of caudal analgesia produced by bupivacaine in children. *Br J Anaesth* 1995; **75**: 698–701
- 35 Cupples P, McNicol R. Common local anaesthetic techniques in children. *Anaesth Intensive Care Med* 2001; **1**: 132–7
- 36 Da Conceicao MJ, Coelho L, Khalil M. Ropivacaine 0.25% compared with bupivacaine 0.25% by the caudal route. *Paediatr Anaesth* 1999; **9**: 229–33
- 37 Dadure C, Acosta C, Capdevila X. Perioperative pain management of a complex orthopedic surgical procedure with double continuous nerve blocks in a burned child. *Anesth Analg* 2004; **98**: 1653–5
- 38 Dadure C, Pirat P, Raux O, et al. Perioperative continuous peripheral nerve blocks with disposable infusion pumps in children: a prospective descriptive study. *Anesth Analg* 2003; **97**: 687–90
- 39 Dadure C, Raux O, Gaudard P, et al. Continuous psoas compartment blocks after major orthopedic surgery in children: a prospective computed tomographic scan and clinical studies. *Anesth Analg* 2004; **98**: 623–8
- 40 Dadure C, Raux O, Troncin R, et al. Continuous infraclavicular brachial plexus block for acute pain management in children. *Anesth Analg* 2003; **97**: 691–3
- 41 Dalens B. *Regional Anesthesia in Infants, Children and Adolescents*. London, UK: Williams & Wilkins Waverly Europe, 1995
- 42 Dalens B. Complications in paediatric regional anaesthesia. In: Proceedings of the 4th European Congress of Paediatric Anaesthesia, Paris, 1997
- 43 Dalens B. Some open questions in pediatric regional anesthesia. *Minerva Anesthesiol* 2003; **69**: 451–6
- 44 Dalens B, Ecoffey C, Joly A, et al. Pharmacokinetics and analgesic effect of ropivacaine following ilioinguinal/iliohypogastric nerve block in children. *Paediatr Anaesth* 2001; **11**: 415–20
- 45 Davis PJ, Lerman J, Suresh S, et al. A randomized multicenter study of remifentanyl compared with alfentanil, isoflurane, or propofol in anesthetized pediatric patients undergoing elective strabismus surgery. *Anesth Analg* 1997; **84**: 982–9
- 46 Davis PJ, Wilson AS, Siewers RD, et al. The effects of cardiopulmonary bypass on remifentanyl kinetics in children undergoing atrial septal defect repair. *Anesth Analg* 1999; **89**: 904–8
- 47 de Beer DA, Thomas ML. Caudal additives in children—solutions or problems? *Br J Anaesth* 2003; **90**: 487–98
- 48 De Negri P, Ivani G, Tirri T, et al. New drugs, new techniques, new indications in pediatric regional anesthesia. *Minerva Anesthesiol* 2002; **68**: 420–7
- 49 De Negri P, Ivani G, Tirri T, et al. A comparison of epidural bupivacaine, levobupivacaine, and ropivacaine on postoperative analgesia and motor blockade. *Anesth Analg* 2004; **99**: 45–8
- 50 De Negri P, Ivani G, Visconti C, et al. How to prolong postoperative analgesia after caudal anaesthesia with ropivacaine in children: S-ketamine versus clonidine. *Paediatr Anaesth* 2001; **11**: 679–83
- 51 De Negri P, Ivani G, Visconti C, et al. The dose-response relationship for clonidine added to a postoperative continuous epidural infusion of ropivacaine in children. *Anesth Analg* 2001; **93**: 71–6
- 52 Derbyshire S, Furedi A, Glover V, et al. Do fetuses feel pain? *Br Med J* 1996; **313**: 795–9
- 53 Dickenson A. Spinal cord pharmacology of pain. *Br J Anaesth* 1995; **75**: 193–200
- 54 Dix P, Prosser DP, Streete P. A pharmacokinetic study of piroxicam in children. *Anaesthesia* 2004; **59**: 984–7
- 55 Doyle E, Harper I, Morton NS. Patient controlled analgesia with low dose background infusions after lower abdominal surgery in children. *Br J Anaesth* 1993; **71**: 818–22
- 56 Doyle E, Morton NS, McNicol LR. Comparison of patient controlled analgesia in children by IV and SC routes of administration. *Br J Anaesth* 1994; **72**: 533–6
- 57 Drover DR, Hammer GB, Williams GD, et al. A comparison of patient state index (PSI) changes and remifentanyl requirements during cardiopulmonary bypass in infants undergoing general anesthesia with or without spinal anaesthesia. *Anesthesiology* 2004; **101**: A1453
- 58 Edwards DJ, Prescella RP, Fratarelli DA, et al. Pharmacokinetics of rofecoxib in children. *Clin Pharmacol Ther* 2004; **75**: 73
- 59 Engelhardt T, Steel E, Johnston G, et al. Tramadol for pain relief in children undergoing tonsillectomy: a comparison with morphine. *Paediatr Anaesth* 2003; **13**: 249–52
- 60 Finley GA, McGrath PJ. *Measurement of Pain in Infants and Children*. Seattle: IASP Press, 1998

- 61 Finley GA, McGrath PJ. *Acute and Procedure Pain in Infants and Children*. Seattle: IASP Press, 2001
- 62 Fitzgerald M. Developmental biology of inflammatory pain. *Br J Anaesth* 1995; **75**: 177–85
- 63 Gaffney A, McGrath PJ, Dick B. Measuring pain in children: Developmental and instrument issues. In: Schechter, NL, Berde, CB Yaster, M, eds. *Pain in Infants, Children, and Adolescents*. Philadelphia: Lippincott Williams & Wilkins, 2003
- 64 Giannakouloupolos X, Sepulveda W, Kourtisk P, et al. Fetal plasma cortisol and beta-endorphin response to intrauterine needling. *Lancet* 1994; **344**: 77–81
- 65 Giaufre E, Dalens B, Gombert A. Epidemiology and morbidity of regional anesthesia in children: a one-year prospective survey of the French-Language Society of Pediatric Anesthesiologists. *Anesth Analg* 1996; **83**: 904–12
- 66 Glover V, Giannakouloupolos X. Stress and pain in the fetus. *Baillieres Clin Paediatr* 1995; **3**: 495–510
- 67 Granry JC, Rod B, Monrign JP, et al. The analgesic efficacy of an injectable prodrug of acetaminophen in children after orthopaedic surgery. *Paediatr Anaesth* 1997; **7**: 445–9
- 68 Hager H, Marhofer P, Sitzwohl C, et al. Caudal clonidine prolongs analgesia from caudal S(+)-ketamine in children. *Anesth Analg* 2002; **94**: 1169–72
- 69 Hansen TG, Henneberg SW, Walther-Larsen S, et al. Caudal bupivacaine supplemented with caudal or intravenous clonidine in children undergoing hypospadias repair: a double-blind study. *Br J Anaesth* 2004; **92**: 223–7
- 70 Hartley R, Levene MI. Opioid pharmacology in the newborn. *Bailliere's Clin Paediatr* 1995; **3**: 467–93
- 71 Hiller A, Taivainen T, Korpela R, et al. Combination of acetaminophen and ketoprofen for postoperative analgesia in children. In: Proceedings of the ASA Annual Meeting, Las Vegas, Nevada, 2004
- 72 Howard RF. Planning for pain relief. *Bailliere's Clin Anaesthesiol* 1996; **10**: 657–75
- 73 Howard RF. Pain management in infants: systemic analgesics. *Br J Anaesth CEPD Rev* 2002; **2**: 37–40
- 74 Howard RF, Lloyd-Thomas A. Pain management in children. In: Sumner, E Hatch, D, eds. *Paediatric Anaesthesia*. London: Arnold, 1999; 317–38
- 75 Humphreys N, Bays SMA, Pawade A, et al. Prospective randomized controlled trial of high dose opioid vs high spinal anaesthesia in infant heart surgery with cardiopulmonary bypass: effects on stress and inflammation. *Paediatr Anaesth* 2004; **14**: 705
- 76 Humphreys N, Bays SMA, Sim D, et al. Spinal anaesthesia with an indwelling catheter for cardiac surgery in children: description and early experience of the technique. *Paediatr Anaesth* 2004; **14**: 704
- 77 Iohom G, Fitzgerald D, Cunningham AJ. Principles of pharmacogenetics—implications for the anaesthetist. *Br J Anaesth* 2004; **93**: 440–50
- 78 Ivani G. Ropivacaine: is it time for children? *Paediatr Anaesth* 2002; **12**: 383–7
- 79 Ivani G, De Negri P, Lonnqvist PA, et al. Caudal anesthesia for minor pediatric surgery: a prospective randomized comparison of ropivacaine 0.2 % vs levobupivacaine 0.2 %. *Paediatr Anaesth* 2005; **15**: 491–4
- 80 Ivani G, DeNegri P, Conio A, et al. Comparison of racemic bupivacaine, ropivacaine, and levo-bupivacaine for pediatric caudal anesthesia: effects on postoperative analgesia and motor block. *Reg Anesth Pain Med* 2002; **27**: 157–61
- 81 Ivani G, Mereto N, Lamgpughani E, et al. Ropivacaine in paediatric surgery: preliminary results. *Paediatr Anaesth* 1998; **8**: 127–30
- 82 Ivani G, Tonetti F. Postoperative analgesia in infants and children: new developments. *Minerva Anestesiol* 2004; **70**: 399–403
- 83 Jamali S, Monin S, Begon C, et al. Clonidine in pediatric caudal anesthesia. *Anesth Analg* 1994; **78**: 663–6
- 84 Joshi W, Connelly NR, Reuben SS, et al. An evaluation of the safety and efficacy of administering rofecoxib for postoperative pain management. *Anesth Analg* 2003; **97**: 35–8
- 85 Kim TW, Harbott M. The use of caudal morphine for pediatric liver transplantation. *Anesth Analg* 2004; **99**: 373–4
- 86 Kirchmair L, Enna B, Mitterschiffthaler G, et al. Lumbar plexus in children. A sonographic study and its relevance to pediatric regional anesthesia. *Anesthesiology* 2004; **101**: 445–50
- 87 Koinig H, Marhofer P. S(+)-ketamine in paediatric anaesthesia. *Paediatr Anaesth* 2003; **13**: 185–7
- 88 Kokinsky E, Nilsson K, Larsson LE. Increased incidence of postoperative nausea and vomiting without additional analgesic effects when a low dose of intravenous fentanyl is combined with a caudal block. *Paediatr Anaesth* 2003; **13**: 334–8
- 89 Kokki H. Nonsteroidal anti-inflammatory drugs for postoperative pain: a focus on children. *Paediatric Drugs* 2003; **5**: 103–23
- 90 Korpela R, Korvenoja P, Meretoja O. Morphine-sparing effect of acetaminophen in pediatric day-case surgery. *Anesthesiology* 1999; **91**: 442–7
- 91 Krane EJ, Jacobsen LE. Postoperative apnea, bradycardia, and oxygen desaturation in formerly premature infants: prospective comparison of spinal and general anesthesia. *Anesthesia and Analgesia* 1995; **80**: 7–13
- 92 Krishna S, Hughes LF, Lin SY. Postoperative hemorrhage with nonsteroidal anti-inflammatory drug use after tonsillectomy. *Arch Otolaryngol Head Neck Surg* 2003; **129**: 1086–9
- 93 Lawson RA, Smart NG, Gudgeon AC, et al. Evaluation of an amethocaine gel preparation for percutaneous analgesia before venous cannulation in children. *Br J Anaesth* 1995; **75**: 282–5
- 94 Lee JJ, Rubin AP. Comparison of a bupivacaine-clonidine mixture with plain bupivacaine for caudal analgesia in children. *Br J Anaesth* 1994; **72**: 258–62
- 95 Lerman J, Nolan J, Eyres R, et al. Efficacy, safety, and pharmacokinetics of levobupivacaine with and without fentanyl after continuous epidural infusion in children: a multicenter trial. *Anesthesiology* 2003; **99**: 1166–74
- 96 Lin YC, Sussman HH, Benitz WE. Plasma concentrations after rectal administration of acetaminophen in preterm neonates. *Paediatr Anaesth* 1997; **7**: 457–9
- 97 Lloyd-Thomas A. Assessment and control of pain in children. *Anaesthesia* 1995; **50**: 753–5
- 98 Lloyd-Thomas AR, Howard RF. A pain service for children. *Paediatr Anaesth* 1994; **4**: 3–15
- 99 Long CP, McCafferty DF, Sittlington NM, et al. Randomized trial of novel tetracaine patch to provide local anaesthesia in neonates undergoing venepuncture. *Br J Anaesth* 2003; **91**: 514–8
- 100 Lonnqvist PA, Ivani G, Moriarty T. Use of caudal-epidural opioids in children: still state of the art or the beginning of the end? *Paediatr Anaesth* 2002; **12**: 747–9
- 101 Lundeberg S, Lonnqvist PA. Update on systemic postoperative analgesia in children. *Paediatr Anaesth* 2004; **14**: 394–7
- 102 Lynn AM. Remifentanyl: the paediatric anaesthetist's opiate? *Paediatr Anaesth* 1996; **6**: 433–5
- 103 Marhofer P, Greher M, Kapral S. Ultrasound guidance in regional anaesthesia. *Br J Anaesth* 2005; **94**: 7–17.
- 104 Marhofer P, Krenn CG, Plochl W, et al. S(+)-ketamine for caudal block in paediatric anaesthesia. *Br J Anaesth* 2000; **84**: 341–5
- 105 Martindale SJ, Dix P, Stoddart PA. Double-blind randomized controlled trial of caudal versus intravenous S(+) ketamine for



- supplementation of caudal analgesia in children. *Br J Anaesth* 2004; **92**: 344–7
- 106 Mather L, Mackie J. The incidence of postoperative pain in children. *Pain* 1983; **15**: 271–82
- 107 Mazoit JX, Dalens BJ. Pharmacokinetics of local anaesthetics in infants and children. *Clin Pharmacokinet* 2004; **43**: 17–32
- 108 McIntyre PM, Ready LB. *Acute Pain Management: A Practical Guide*. London: WB Saunders, 1996
- 109 McKenzie I, Gaukroger PB, Ragg P, et al. *Manual of Acute Pain Management in Children*. London: Churchill Livingstone, 1997
- 110 McNeely JK, Farber NE, Rusy LM, et al. Epidural analgesia improves outcome following pediatric fundoplication. A retrospective analysis. *Reg Anesth Pain Med* 1997; **22**: 16–23
- 111 McNicol LR. Post-operative analgesia in children using continuous subcutaneous morphine. *Br J Anaesth* 1993; **71**: 752–6
- 112 McQuay H, Moore A. *An Evidence-Based Resource for Pain Relief*. Oxford: Oxford Medical Publications, 1998
- 113 Moiniche S, Romsing J, Dahl J, et al. Nonsteroidal antiinflammatory drugs and the risk of operative site bleeding after tonsillectomy: a quantitative systematic review. *Anesth Analg* 2003; **96**: 68–77
- 114 Montgomery C, McCormack JP, Reichert CC, et al. Plasma concentrations after high dose (45 mg/kg) rectal acetaminophen in children. *Can J Anaesth* 1995; **42**: 982–6
- 115 Morris JL, Rosen DA, Rosen KR. Nonsteroidal anti-inflammatory agents in neonates. *Paediatric Drugs* 2003; **5**: 385–405
- 116 Morton NS. Development of a monitoring protocol for the safe use of opioids in children. *Paediatr Anaesth* 1993; **3**: 179–84
- 117 Morton NS. Paediatric postoperative analgesia. *Curr Opin Anaesthesiol* 1996; **9**: 309–12
- 118 Morton NS. Practical paediatric day case anaesthesia and analgesia. In: Millar J, ed. *Practical Day Case Anaesthesia*. Oxford: Bios Scientific Publications Ltd, 1997; 141–52
- 119 Morton NS. *Acute Paediatric Pain Management – A Practical Guide*. London: WB Saunders, 1998
- 120 Morton NS. Ropivacaine in children. *Br J Anaesth* 2000; **85**: 344–6
- 121 Morton NS. Local and regional anaesthesia in infants. *Contin Educ Anaesth Crit Care Pain* 2004; **4**: 148–51
- 122 Morton NS, Benham SW, Lawson RA, et al. Diclofenac vs oxybuprocaine eyedrops for analgesia in paediatric strabismus surgery. *Paediatr Anaesth* 1997; **7**: 221–6
- 123 Morton NS, O'Brien K. Analgesic efficacy of paracetamol and diclofenac in children receiving PCA morphine. *Br J Anaesth* 1999; **83**: 715–7
- 124 Morton NS, Peutrell JM. *Paediatric Anaesthesia and Critical Care in the District Hospital: A Practical Guide*. Oxford: Butterworth-Heinemann Medical, 2003
- 125 Morton NS, Raine PAM. *Paediatric Day Case Surgery*. Oxford: Oxford University Press, 1994
- 126 Naguib M, Sharif AMY, Seraj M, et al. Ketamine for caudal analgesia in children: comparison with caudal bupivacaine. *Br J Anaesth* 1991; **67**: 559–64
- 127 Nandi R, Beacham D, Middleton J, et al. The functional expression of mu opioid receptors on sensory neurons is developmentally regulated; morphine analgesia is less selective in the neonate. *Pain* 2004; **111**: 38–50
- 128 Park JM, Houck CS, Sethna NF, et al. Ketorolac suppresses postoperative bladder spasms after pediatric ureteral reimplantation. *Anesth Analg* 2000; **91**: 11–5
- 129 Paut O, Schreiber E, Lacroix F, et al. High plasma ropivacaine concentrations after fascia iliaca compartment block in children. *Br J Anaesth* 2004; **92**: 416–8
- 130 Peutrell JM, Mather SJ. *Regional Anaesthesia in Babies and Children*. Oxford, UK: Oxford University Press, 1997
- 131 Pickering AE, Bridge HS, Nolan J, et al. Double-blind, placebo-controlled analgesic study of ibuprofen or rofecoxib in combination with paracetamol for tonsillectomy in children. *Br J Anaesth* 2002; **88**: 72–7
- 132 Prys-Roberts C, Lerman J, Murat I, et al. Comparison of remifentanyl versus regional anaesthesia in children anaesthetised with isoflurane/nitrous oxide. *Anaesthesia* 2000; **55**: 870–6
- 133 Rapp HJ, Molnar V, Austin S, et al. Ropivacaine in neonates and infants: a population pharmacokinetic evaluation following single caudal block. *Paediatr Anaesth* 2004; **14**: 724–32
- 134 Royal College of Anaesthetists. *Guidelines for the use of non-steroidal anti-inflammatory drugs in the perioperative period*. London: R.C.A., 1998
- 135 RCPCH. *Prevention and Control of Pain in Children*. London: BMJ Publishing Group, 1997
- 136 RCPCH. *Medicines for Children 2003*. London: RCPCH, 2003
- 137 Romsing J, Ostergaard D, Senderovitz T, et al. Pharmacokinetics of oral diclofenac and acetaminophen in children after surgery. *Paediatr Anaesth* 2001; **11**: 205–13
- 138 Ross AK, Davis PJ, Dear GL, et al. Pharmacokinetics of remifentanyl in anesthetized pediatric patients undergoing elective surgery or diagnostic procedures. *Anesth Analg* 2001; **93**: 1393–401
- 139 Ross AK, Eck JB, Tobias JD. Pediatric regional anesthesia: beyond the caudal. *Anesth Analg* 2000; **91**: 16–26
- 140 Sanders JC. Paediatric regional anaesthesia, a survey of practice in the United Kingdom. *Br J Anaesth* 2002; **89**: 707–10
- 141 Schechter NL, Berde C, Yaster M. *Pain in Infants, Children, and Adolescents*, 2nd edn. Philadelphia: Lippincott, Williams and Wilkins, 2003
- 142 Schwab JM, Schluesener HJ, Meyermann R, et al. COX-3 the enzyme and the concept: steps towards highly specialized pathways and precision therapeutics? *Prostaglandin Leukotr Essent Fatty Acids* 2003; **69**: 339–43
- 143 Semple D, Aldridge L, Doyle E. Comparison of i.v and s.c. diamorphine infusions for the treatment of acute pain in children. *Br J Anaesth* 1996; **76**: 310–2
- 144 Sheeran PW, Rose JB, Fazi LM, et al. Rofecoxib administration to paediatric patients undergoing adenotonsillectomy. *Paediatr Anaesth* 2004; **14**: 579–83
- 145 Short JA, Barr CA, Palmer CD, et al. Use of diclofenac in children with asthma. *Anaesthesia* 2000; **55**: 334–7
- 146 St Rose E, Fernandez M, Kiss M, et al. Steady-state plasma concentrations of rofecoxib in children (ages 2–5 years) with juvenile rheumatoid arthritis. *Arthritis Rheum* 2001; **44**: S291
- 147 Stempak D, Gammon J, Klein J, et al. Single-dose and steady-state pharmacokinetics of celecoxib in children. *Clin Pharmacol Ther* 2002; **72**: 490–7
- 148 Taddio A, Goldbach M, Ipp M, et al. Effect of neonatal circumcision on pain responses during vaccination in boys. *Lancet* 1994; **344**: 291–2
- 149 Taddio A, Goldbach M, Ipp M, et al. Effect of neonatal circumcision on pain responses during vaccination in boys. *Lancet* 1995; **345**: 291–2
- 150 Taddio A, Katz J, Ilersich AL, et al. Effect of neonatal circumcision on pain response during subsequent routine vaccination. *Lancet* 1997; **349**: 599–603
- 151 Taylor R, Eyres R, Chalkiadis GA, et al. Efficacy and safety of caudal injection of levobupivacaine 0.25% in children under 2 years of age undergoing inguinal hernia repair, circumcision or orchidopexy. *Paediatr Anaesth* 2003; **13**: 114–21

- 152** Tobias JD. A review of intrathecal and epidural analgesia after spinal surgery in children. *Anesth Analg* 2004; **98**: 956–65
- 153** Tsui BCH, Seal R, Koller J. Thoracic epidural catheter placement via the caudal approach in infants by using electrocardiographic guidance. *Anesth Analg* 2002; **95**: 326–30
- 154** Tsui BCH, Seal R, Koller J, et al. Thoracic epidural analgesia via the caudal approach in pediatric patients undergoing fundoplication using nerve stimulation guidance. *Anesth Analg* 2001; **93**: 1152–5
- 155** Turner S, Ford V. Role of the selective cyclooxygenase 2 (COX-2) inhibitors in children. *Arch Dis Child Educ Pract Ed* 2004; **89**: ep46–ep9
- 156** Valairucha S, Seefelder C, Houck C. Thoracic epidural catheters placed by the caudal route in infants: the importance of radiographic confirmation. *Paediatr Anaesth* 2002; **12**: 424–8
- 157** Vallee E, Lafrenaye S, Dorion D. Rofecoxib in pain control after tonsillectomy in children. *Pain* 2004; **5**: S84
- 158** Vas L, Kulkarni V, Mali M, et al. Spread of radioopaque dye in the epidural space in infants. *Paediatr Anaesth* 2003; **13**: 233–43
- 159** Vetter TR, Heiner EJ. Intravenous ketorolac as an adjuvant to pediatric patient-controlled analgesia with morphine. *J Clin Anesth* 1994; **6**: 110–3
- 160** Watson DM. Topical amethocaine in strabismus surgery. *Anaesthesia* 1991; **46**: 368–70
- 161** William JM, Stoddart PA, Williams SA, et al. Post-operative recovery after inguinal herniotomy in ex-premature infants: comparison between sevoflurane and spinal anaesthesia. *Br J Anaesth* 2001; **86**: 366–71
- 162** Wilson GA, Brown JL, Crabbe DG, et al. Is epidural analgesia associated with an improved outcome following open Nissen fundoplication? *Paediatr Anaesth* 2001; **11**: 65–70
- 163** Wolf A. Treat the babies, not their stress responses. *Lancet* 1993; **342**: 324–7
- 164** Wolf A. Development of pain and stress responses. In: Proceedings of the 4th European Congress of Paediatric Anaesthesia, Paris, 1997
- 165** Wolf AR. Tears at bedtime: a pitfall of extending paediatric day-case surgery without extending analgesia. *Br J Anaesth* 1999; **82**: 319–20
- 166** Wolf AR, Doyle E, Thomas E. Modifying infant stress responses to major surgery: spinal vs extradural vs opioid analgesia. *Paediatr Anaesth* 1998; **8**: 305–11
- 167** Wolf AR, Eyres RL, Laussen PC, et al. Effect of extradural analgesia on stress responses to abdominal surgery in infants. *Br J Anaesth* 1993; **70**: 654–60
- 168** Wolf AR, Lawson RA, Fisher S. Ventilatory arrest after a fluid challenge in a neonate receiving sc morphine. *Br J Anaesth* 1995; **75**: 787–9
- 169** Wolf AR, Valley RD, Fear DW, et al. Bupivacaine for caudal analgesia in infants and children: the optimal effective concentration. *Anesthesiology* 1988; **69**: 102–6
- 170** Yaster M, Berde CB, Meretoja O, et al. Pharmacokinetics, safety and efficacy of 24–72 h epidural infusion of ropivacaine in 1–9 year old children. *Paediatr Anaesth* 2002; **12**: 98–9
- 171** Zwaveling J, Bubbers S, Van Meurs AHJ, et al. Pharmacokinetics of rectal tramadol in postoperative paediatric patients. *Br J Anaesth* 2004; **93**: 224–7
